# Supplementary figures and images for: Imperatorin Restores Chemosensitivity of Multidrug-Resistant Cancer Cells by Antagonizing ABCG2-Mediated Drug Transport
Source: MDPI journal article supplement (doi:10.3390/ph16111595), 2023-11-12

(a) S1-MI-80

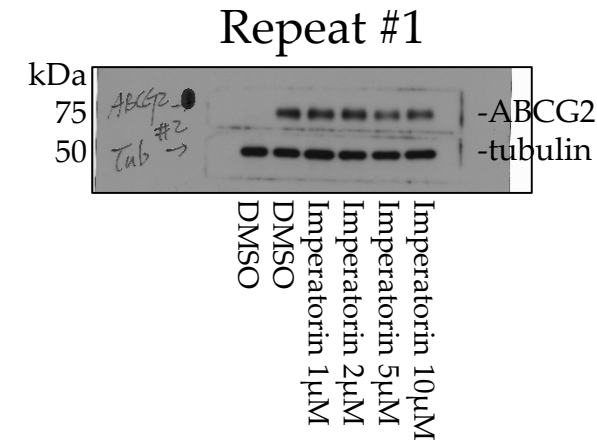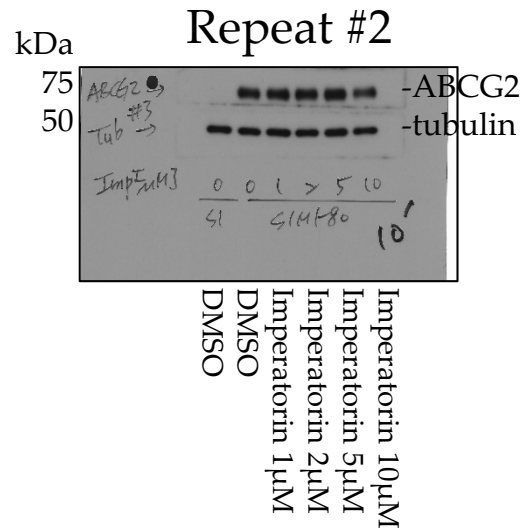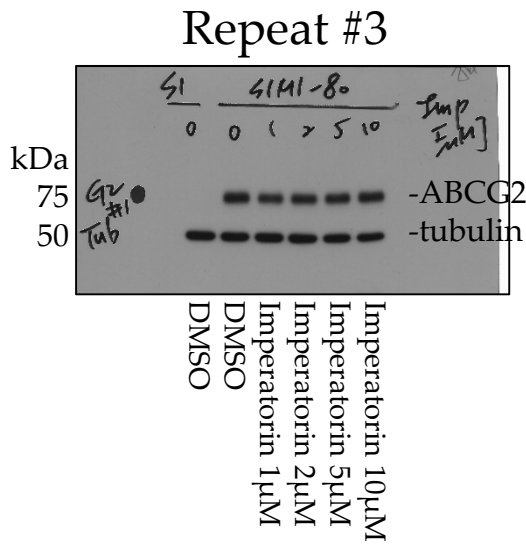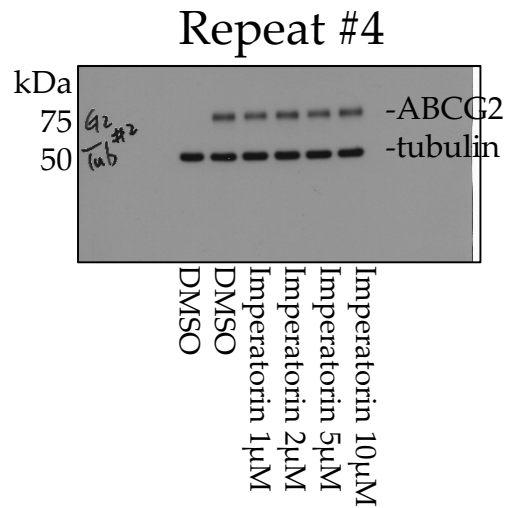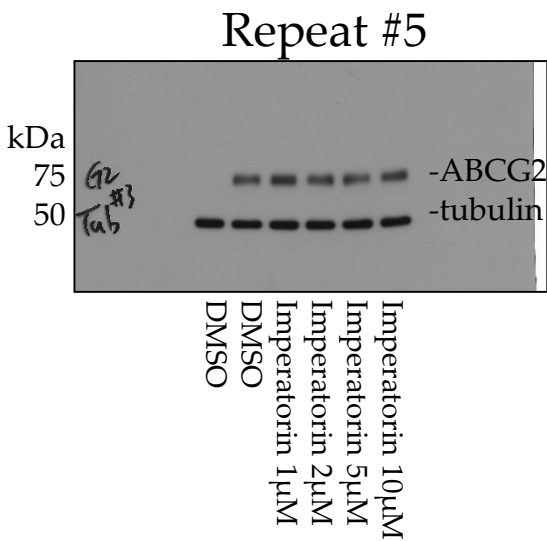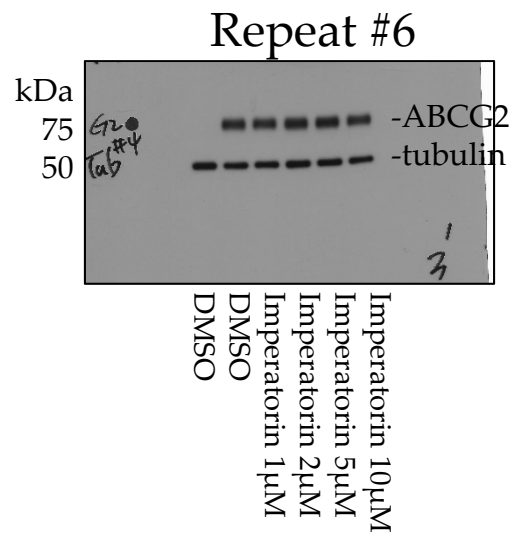

(b) H460-MX20

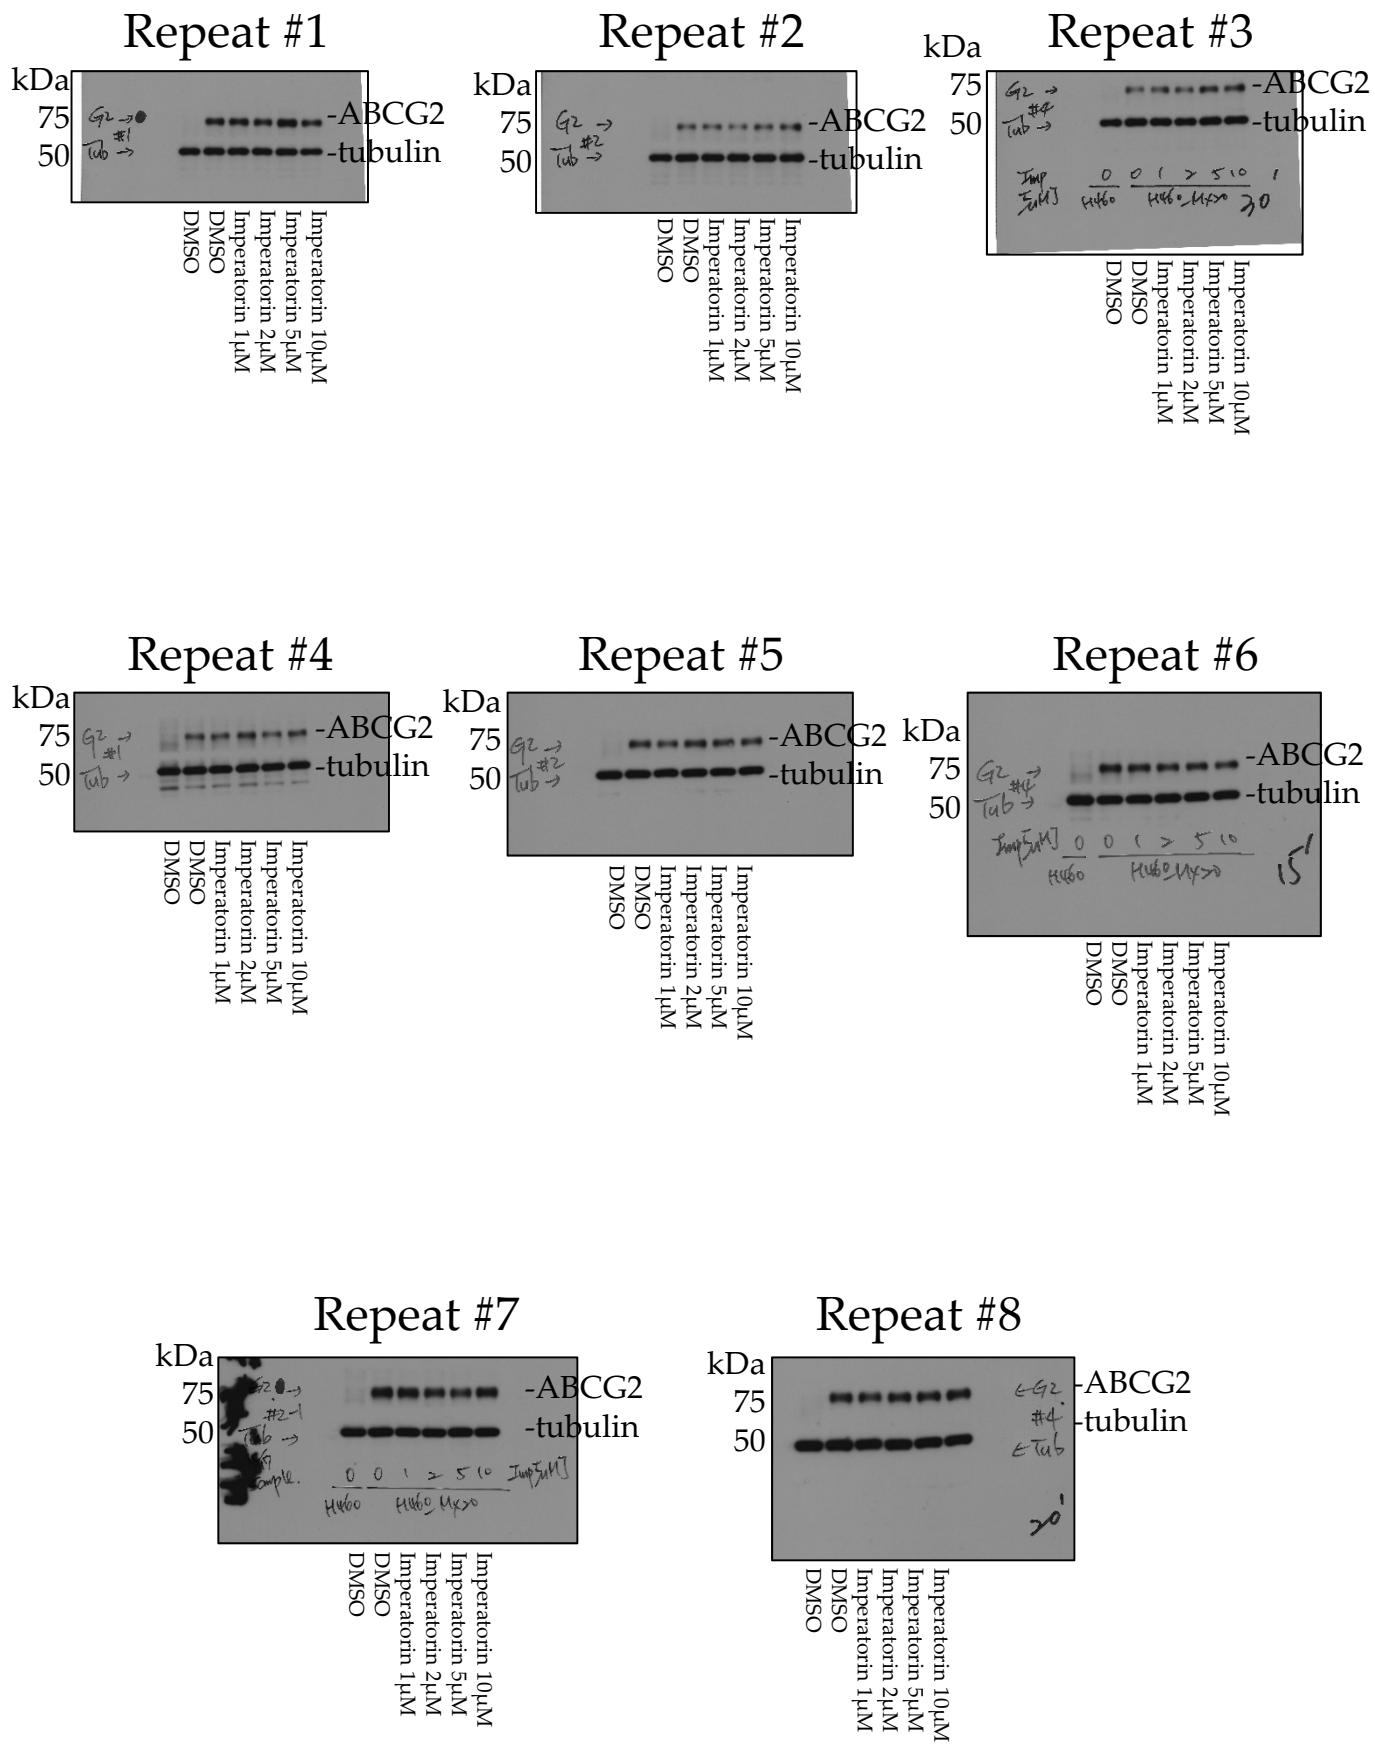

Figure S1: original Western blots for Figure 5.

Supplement: s1 [file s1]
